# Supplementary material
Source: PubMed Central journal article supplement (PMC5798881)
Supplement: NIHMS936233-supplement-Supplementary_Appendix.pdf [file NIHMS936233-supplement-Supplementary_Appendix.pdf]

## Supplementary Appendix

This appendix has been provided by the authors to give readers additional information about their work.

Supplement to: Deen GF, Broutet N, Xu W, et al. Ebola RNA persistence in semen of Ebola virus disease survivors — final report. *N Engl J Med* 2017;377:1428-37. DOI: 10.1056/NEJMoa1511410

## Supplementary Appendix

### Sierra Leone Ebola Virus Persistence Study Group:

- **Sierra Leone Ministry of Health and Sanitation:** Gibrilla Fadlu Deen (principal investigator), James Bangura, Amara Jambai, Faustine James, Alie H. Wurie, Francis Yamba
- **Sierra Leone Ministry of Defence:** Foday Sahr Thomas, Foday R. Sesay, Thomas A. Massaquoi
- **Sierra Leone Ministry of Social Welfare, Gender, Children's Affairs:** Tina Davies
- **World Health Organization (WHO):** Nathalie Broutet (principal investigator), Pierre Formenty, Anna E. Thorson, Archchun Ariyaratnam, Marilyn Carino, Antoine Coursier, Kara N. Durski, Ndema Habib, Philippe Gaillard, Sihem Landoulsi, Margaret O. Lamunu, Jaclyn E. Marrinan, Suzanna L. R. McDonald, Dhamari Naidoo
- **United States Centers for Disease Control and Prevention (US-CDC):** Barbara Knust (principal investigator), Neetu Abad, Kyle T. Bernstein, Elizabeth Ervin, John D. Klena, Tasneem Malik, Oliver Morgan, Stuart T. Nichol, Christine Ross, Ute Ströher
- **Chinese Center for Disease Control and Prevention (China-CDC):** Wenbo Xu (principal investigator), Hongtu Liu, William Jun Liu, Yong Zhang, Guizhen Wu, Mifang Liang
- **Joint United Nations Programme on HIV/AIDS (UNAIDS):** Patricia Ongpin

**Additional group contributors for this publication:** Aneesah Akbar-Uqdah (**US-CDC**), Florence Baingana (**WHO**), Sarah D. Bennett (**US-CDC**), Aaron Brault (**US-CDC**), Faiqa Ebrahim (**WHO**), Bobbie Rae Erickson (**US-CDC**), Sara Hersey (**US-CDC**), Jill Huppert (**US-CDC**), Dianna Ng (**US-CDC**), Lydia Poroman (**US-CDC**), Lance Presser (**US-CDC**), Elin Roos (**WHO**), Tara K. Sealy (**US-CDC**), Carmen Valle (**WHO**), Teodora Wi (**WHO**), Zabulon Yoti (**WHO**)

### Acknowledgments:

#### All study participants

#### Military Hospital 34 and Lungi General Hospital staff

#### The Sierra Leone Association of Ebola Survivors (Yusuf Kabba)

#### The association of Survivors from Lungi (exact name and name of the responsible)

**WHO:** Ian Askew, Bruce Aylward, Rachel Baggaley, Anshu Banerjee, George Bindi, Rick Brennan, Mauricio Calderon, Ian Crozier, Christopher Dye, Peter Graaff, James N. Kiarie, Marie-Paule Kieny, Anders Nordström, Collins Owili, Lee Sharkey, Shalini Singaravelu, Yasuko Shinozaki, Lisa Thomas, Hannah Yankson

**US-CDC:** Brian Bird, Jeffrey Brock, Bobbie Rae Erickson, Brandy Maddox, Bridget Mugisa, Pierre Rollin, Celine Taboy, Jonathan Towner

**MOHS:** Tom Sesay, Ami Shमित Koroma, Mariama Ellie

We thank all the study participants, without whom this study would not have been possible. We thank all site staff (MH34 and LGH). For assistance with participant recruitment, messaging and communication we are grateful to the Sierra Leone Association of Ebola Survivors (Yusuf Kabba) and the Network for HIV Positives in Sierra Leone (Idrissa Songo). We thank Dignity Association (Hudson Tucker) for their support with training, messaging and communication; the Government of Sierra Leone National AIDS Secretariat (Momodu Sesay, Abu Bakar Koroma) and National AIDS Control Program (Sartie Kenneh, Mariama Conteh) for commodity provision and assistance with training; the Government of Sierra Leone MOHS Food and Nutrition Directorate for training and counselling support, and UNAIDS for their support with training. We thank UNICEF (Vandana Joshi), UNFPA and WFP for commodity provisions and UNAIDS (Michael Gboun) for staff provision.
